# Supplementary material for: Soil moisture redistribution and its effect on inter-annual active layer temperature and thickness variations in a dry loess terrace in Adventdalen, Svalbard
Source: Copernicus journal article supplement (doi:10.5194/tc-11-635-2017), 2017-02-28
Supplement: Supplementary file 1 [file tc-11-635-2017-supplement.pdf]

Supplement of The Cryosphere, 11, 635–651, 2017  
<http://www.the-cryosphere.net/11/635/2017/>  
doi:10.5194/tc-11-635-2017-supplement  
© Author(s) 2017. CC Attribution 3.0 License.

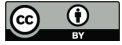

*Supplement of*

**Soil moisture redistribution and its effect on inter-annual active layer temperature and thickness variations in a dry loess terrace in Adventdalen, Svalbard**

**Carina Schuh et al.**

*Correspondence to:* Andrew Frampton ([andrew.frampton@natgeo.su.se](mailto:andrew.frampton@natgeo.su.se))

The copyright of individual parts of the supplement might differ from the CC-BY 3.0 licence.

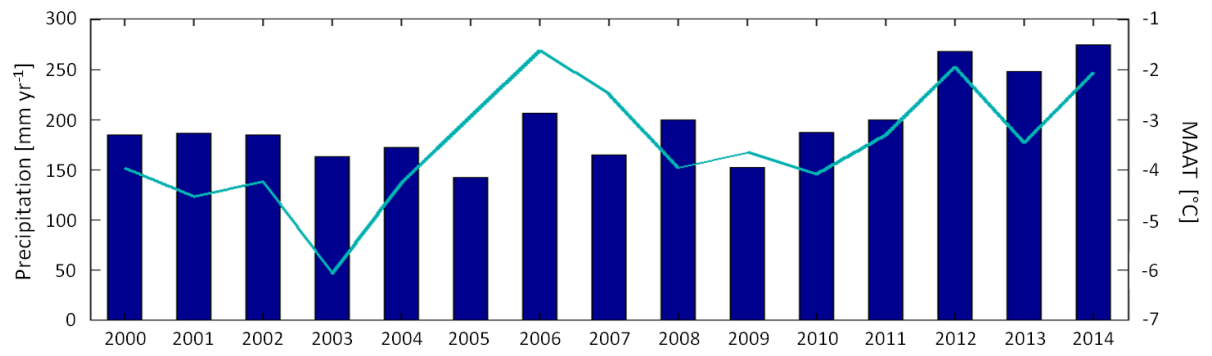

Figure S1: Mean annual precipitation [mm yr<sup>-1</sup>] (blue bars) and air temperature [°C] (cyan line) at Svalbard airport weather station between 2000 and 2014 (Data: Norwegian Meteorological Institute).
